# Supplementary material for: Chunking or predicting – frequency information and reduction in the perception of multi-word sequences
Source: publisher site journal article supplement (doi:10.1515/cog-2017-0138), 2019-07-13
Supplement: Supplementary file 1 [file cog-2017-0138ad.zip]

David Lorenz & David Tizón-Couto

**Supplementary material**

to

**Chunking or predicting – frequency information and reduction in the perception of multi-word sequences**

to be published in

*Cognitive Linguistics*

**A) Data and analyses**

The data from the reported experiment, as well as R scripts for the statistical modelling and graphs, are available at the TROLLing data repository:

<https://doi.org/10.18710/7TSABU>

**B) List of stimulus sentences**

**Practice items**

*01) It’s not very pleasant to ride an elephant down a mountain.*

*02) It’s not very pleasant riding an elephant to the zoo.*

*03) We’ll take our elephant for a pleasant ride in the jungle.*

*04) To me this looks like a monkey riding an elephant.*

**Test items** (contain a V *to* Vinf construction, presented with full or reduced *to*)

*05) It’s not that I desire to have a giraffe but it would be nice.*

*06) I think I want to have a penguin for companionship.*

*07) By then we began to see our penguin as a family member.*

*08) When the giraffe arrived I refused to show up at his welcome party.*

*10) The elephants all agreed to have their tusks painted.*

*11) Now that the penguins are gone we’re yearning to see them again.*

*12) The penguins liked it when you offered to help them with their shopping.*

*13) We don’t have a baby giraffe but we plan to get one next year.*

*14) The elephant is an excellent chess player, but I aspire to beat him one day.*

*15) The next day we prepared to leave the jungle for good.*

*16) When the monkeys have their party I prefer to leave the house.*

*17) When the penguins are around we pretend to like the way they dress.*

*18) The next time I’m away don’t forget to give the camels their food.*

*20) I know it’s necessary but I hate to see the monkey locked up in that cage.*

*21) Now all the monkeys are itching to go partying with the penguins.*

*22) The way the penguins dress they seem to have a lot of money.*

*23) The giraffe may be smart but I continue to have doubts about his backgammon skills.*

*24) But if one day you dare to go in the tiger’s den, let’s hope he’s not hungry.*

*25) Those African giraffes, they tend to get overly excited at playing backgammon.*

*26) The penguins, they used to eat ice cream every day.*

*27) Now that we have started to play backgammon every evening, the elephants are much happier.*

*28) The tiger is angry because you failed to give him his medicine.*

*29) When the monkeys laugh they don’t mean to be rude.*

*30) When the giraffe is here we intend to give him a room upstairs.*

*31) Instead of working I chose to play chess with the tiger all day.*

*32) Good game, but I regret to tell you that this is checkmate.*

*33) Surely you would never deign to play chess with my camel.*

*34) After all this, we deserve to have some fun at the penguins’ party.*

*35) If the camel’s sick we have to give him his medicine.*

*36) After dinner I’m going to play backgammon with the camel.*

*37) Careful now, we need to watch out for monkeys around here.*

*38) So now we’re trying to build a canoe for the tiger.*

*39) When the penguins come, we strive to make them happy.*

*40) So in the end I promised to go camping with the monkeys.*

*41) Like it or not, we happen to have the tallest giraffe in town.*

*42) In the evening we love to play backgammon with the camel.*

*43) When dancing with the tiger you cease to be afraid of him.*

*44) Last week I volunteered to do the chicken dance with the camel.*

*45) Since I was little I craved to have my own African giraffe.*

*46) When the penguins arrived we vowed to give them music lessons.*

*47) When I play music I fear to wake up the tiger that lives next door.*

*48) The next time you remember to lock the tiger’s cage.*

[numbers 9 and 19 are missing because they were assigned to items that were not included in the end.]

**Control items** (contain *to* in a different construction, presented with full *to*)

*05) I don’t desire anything special but it would be nice to have a giraffe.*

*06) Maybe I want a penguin just to keep me entertained.*

*07) So then I began a course on how to keep a penguin.*

*08) Today my elephant refused his morning coffee and paid no attention to the radio.*

*10) We all agreed that it was a bad idea to paint the elephants’ tusks.*

*11) Now that they have gone to the zoo we’re yearning for our monkeys.*

*12) When I offered chocolate to the penguins they eyed me with suspicion.*

*13) What we plan for next year is to get a baby giraffe.*

*14) These penguins all aspire for jobs as fashion models, but those are hard to get.*

*15) The monkeys have prepared a surprise party to welcome our giraffe.*

*16) At dinner parties I prefer penguins to monkeys.*

*17) When the monkeys come over to dance I pretend I’m asleep.*

*18) I forgot that the camels had gone to the penguins’ dinner party.*

*20) I hate being rude to the monkey but sometimes there’s no other way.*

*21) Don’t get close to the camel when he’s itching for a fight.*

*22) The way the penguins look they seem happy to be home.*

*23) We’ll continue the game later but now it’s time to have some dinner.*

*24) Our tiger, you can even give a kiss to him if you dare.*

*25) Your only duty is to tend the camels and giraffes while I am away.*

*26) Penguins can’t fly, but they use their wings to swim.*

*27) We just started one more game of chess, just to pass the time.*

*28) It’s hard to believe that the monkey has failed another maths exam.*

*29) When the monkeys are friendly to you, they don’t mean it.*

*30) I intend on giving the harmonica to the tiger for his birthday.*

*31) We chose a nice backgammon set that we will give to the camel.*

*32) I almost regret coming to the camel’s welcome party now.*

*33) The monkey always has things to do, day and night.*

*34) The penguins deserved some vacation time, so they went to Antarctica.*

*35) We have several sick camels here to take care of.*

*36) The tiger and I are going on a canoeing trip to Sweden.*

*37) We need three ropes in order to keep the camel from dancing.*

*38) We’re trying another trick now to make the elephant eat his soup.*

*39) It’s nice for the elephant to play trumpet, but we strive for a whole orchestra.*

*40) Thing is, I promised that I would go to the doctor with our giraffe.*

*41) Bad things will happen if you don’t make it to the tiger’s cage before him.*

*42) I love backgammon, but it’s no fun to play it with the camel.*

*43) We are here to see the tiger dance, so cease the fighting, please.*

*44) What brought you to volunteer as percussionist in the penguins’ blues band?*

*45) My pregnant giraffe craved mangoes, so I went to the store.*

*46) You see I vowed that I would come to the penguins’ blues concert.*

*47) When the tiger plays the harmonica, that is something to fear.*

*48) Remember how we went to Antarctica with the penguins?*

[numbers 9 and 19 are missing because they were assigned to items that were not included in the end.]

**Distractor items** (contain no *to*)

*d2) In fact, canoeing is the crocodiles’ favorite sport.*

*d3) On Wednesday the monkeys formed a jazz combo.*

*d4) There is just no point in teaching the crocodiles manners.*

*d5) Now the harmonica is broken, the tiger sings a-cappella.*

*d6) The crocodiles can stay, as long as the don’t make any trouble.*

*d7) Perhaps the penguins should let the tiger join their blues band.*

*d8) You see, the penguins never felt quite at home in the jungle.*

*d10) There are a lot of coconuts left over from the monkeys’ party.*

*d11) The crocodiles are not invited when we play backgammon.*

*d12) Yesterday I was told that the camel was getting better.*

*d13) This morning I gave the camel the wrong medicine.*

*d14) Next week we will send our camel on a vacation.*

*d15) Whoever has taken the elephant’s trumpet should bring it back.*

*d16) The penguins say that chocolate is not part of their usual diet.*

*d17) When the elephant comes home he takes a dip in the pond.*

*d18) Our African giraffe is now taking a yoga course.*

*d19) I’m afraid the elephant is a little big for this rocking chair.*

*d20) Are there any games other than backgammon that we can play?*

*d21) Our giraffe can reach the cookie box on top of the cupboard.*

*d22) Someone should help the monkeys with their math homework.*

*d23) That old rocking chair can keep the monkeys occupied for hours.*

*d24) There is no reason for being afraid of the crocodiles.*

*d25) What makes you think the crocodiles are not interested in dancing?*

*d26) For weeks now we haven’t come across a human being.*

*d27) It’s been three hours since the crocodiles had their dinner.*

*d28) Finally the penguins convinced me that they should get music lessons.*

*d29) The camel and the penguins are having an argument about shoes.*

*d30) The problem with the crocodiles is that they never share their food.*

*d31) Unfortunately the tiger is not a very talented dancer.*

*d32) There are many things that you can eat in the jungle.*

*d33) When canoeing in the jungle you should always wear a hat.*

*d34) But you must be really careful with the tiger’s harmonica.*

*d35) That backgammon competition last night got out of hand.*

*d36) When we played chess the giraffe picked up the rules very quickly.*

*d37) The elephant is hiding chocolate all over the house.*

*d38) I think our elephant is making friends with those crocodiles.*

*d39) You see, chess is simply not a game for three players.*

*d40) I never understood why the trees in the jungle are so tall.*

*d41) The elephant placed a bowl of soup on the table in front of him and rubbed his hands.*

*d42) I can’t believe the crocodiles are selling leather handbags.*

*d43) Yesterday the monkey climbed higher up than ever before.*

*d45) During the night the jungle is full of eerie noises.*

[numbers 1, 9 and 44 are missing because they were assigned to items that were not included in the end.]
