# Supplementary material for: Chunking or predicting – frequency information and reduction in the perception of multi-word sequences
Source: publisher site journal article supplement (doi:10.1515/cog-2017-0138), 2019-07-13
Supplement: Supplementary file 1 [file cog-2017-0138ad.zip]

David Lorenz & David Tizón-Couto

**Supplementary material**  
to

**Chunking or predicting – frequency information and reduction in the  
perception of multi-word sequences**

to be published in  
*Cognitive Linguistics*

**A) Data and analyses**

The data from the reported experiment, as well as R scripts for the statistical modelling and graphs, are available at the TROLLing data repository:

<https://doi.org/10.18710/7TSABU>

**B) List of stimulus sentences**

**Practice items**

- 01) *It's not very pleasant to ride an elephant down a mountain.*
- 02) *It's not very pleasant riding an elephant to the zoo.*
- 03) *We'll take our elephant for a pleasant ride in the jungle.*
- 04) *To me this looks like a monkey riding an elephant.*

**Test items** (contain a V *to* V<sub>inf</sub> construction, presented with full or reduced *to*)

- 05) *It's not that I desire to have a giraffe but it would be nice.*
- 06) *I think I want to have a penguin for companionship.*
- 07) *By then we began to see our penguin as a family member.*
- 08) *When the giraffe arrived I refused to show up at his welcome party.*
- 10) *The elephants all agreed to have their tusks painted.*
- 11) *Now that the penguins are gone we're yearning to see them again.*
- 12) *The penguins liked it when you offered to help them with their shopping.*
- 13) *We don't have a baby giraffe but we plan to get one next year.*
- 14) *The elephant is an excellent chess player, but I aspire to beat him one day.*
- 15) *The next day we prepared to leave the jungle for good.*
- 16) *When the monkeys have their party I prefer to leave the house.*
- 17) *When the penguins are around we pretend to like the way they dress.*
- 18) *The next time I'm away don't forget to give the camels their food.*
- 20) *I know it's necessary but I hate to see the monkey locked up in that cage.*
- 21) *Now all the monkeys are itching to go partying with the penguins.*

- 22) *The way the penguins dress they seem to have a lot of money.*
- 23) *The giraffe may be smart but I continue to have doubts about his backgammon skills.*
- 24) *But if one day you dare to go in the tiger's den, let's hope he's not hungry.*
- 25) *Those African giraffes, they tend to get overly excited at playing backgammon.*
- 26) *The penguins, they used to eat ice cream every day.*
- 27) *Now that we have started to play backgammon every evening, the elephants are much happier.*
- 28) *The tiger is angry because you failed to give him his medicine.*
- 29) *When the monkeys laugh they don't mean to be rude.*
- 30) *When the giraffe is here we intend to give him a room upstairs.*
- 31) *Instead of working I chose to play chess with the tiger all day.*
- 32) *Good game, but I regret to tell you that this is checkmate.*
- 33) *Surely you would never deign to play chess with my camel.*
- 34) *After all this, we deserve to have some fun at the penguins' party.*
- 35) *If the camel's sick we have to give him his medicine.*
- 36) *After dinner I'm going to play backgammon with the camel.*
- 37) *Careful now, we need to watch out for monkeys around here.*
- 38) *So now we're trying to build a canoe for the tiger.*
- 39) *When the penguins come, we strive to make them happy.*
- 40) *So in the end I promised to go camping with the monkeys.*
- 41) *Like it or not, we happen to have the tallest giraffe in town.*
- 42) *In the evening we love to play backgammon with the camel.*
- 43) *When dancing with the tiger you cease to be afraid of him.*
- 44) *Last week I volunteered to do the chicken dance with the camel.*
- 45) *Since I was little I craved to have my own African giraffe.*
- 46) *When the penguins arrived we vowed to give them music lessons.*
- 47) *When I play music I fear to wake up the tiger that lives next door.*
- 48) *The next time you remember to lock the tiger's cage.*

[numbers 9 and 19 are missing because they were assigned to items that were not included in the end.]

**Control items** (contain *to* in a different construction, presented with full *to*)

- 05) *I don't desire anything special but it would be nice to have a giraffe.*
- 06) *Maybe I want a penguin just to keep me entertained.*
- 07) *So then I began a course on how to keep a penguin.*
- 08) *Today my elephant refused his morning coffee and paid no attention to the radio.*
- 10) *We all agreed that it was a bad idea to paint the elephants' tusks.*
- 11) *Now that they have gone to the zoo we're yearning for our monkeys.*
- 12) *When I offered chocolate to the penguins they eyed me with suspicion.*
- 13) *What we plan for next year is to get a baby giraffe.*
- 14) *These penguins all aspire for jobs as fashion models, but those are hard to get.*
- 15) *The monkeys have prepared a surprise party to welcome our giraffe.*
- 16) *At dinner parties I prefer penguins to monkeys.*
- 17) *When the monkeys come over to dance I pretend I'm asleep.*
- 18) *I forgot that the camels had gone to the penguins' dinner party.*

- 20) *I hate being rude to the monkey but sometimes there's no other way.*
- 21) *Don't get close to the camel when he's itching for a fight.*
- 22) *The way the penguins look they seem happy to be home.*
- 23) *We'll continue the game later but now it's time to have some dinner.*
- 24) *Our tiger, you can even give a kiss to him if you dare.*
- 25) *Your only duty is to tend the camels and giraffes while I am away.*
- 26) *Penguins can't fly, but they use their wings to swim.*
- 27) *We just started one more game of chess, just to pass the time.*
- 28) *It's hard to believe that the monkey has failed another maths exam.*
- 29) *When the monkeys are friendly to you, they don't mean it.*
- 30) *I intend on giving the harmonica to the tiger for his birthday.*
- 31) *We chose a nice backgammon set that we will give to the camel.*
- 32) *I almost regret coming to the camel's welcome party now.*
- 33) *The monkey always has things to do, day and night.*
- 34) *The penguins deserved some vacation time, so they went to Antarctica.*
- 35) *We have several sick camels here to take care of.*
- 36) *The tiger and I are going on a canoeing trip to Sweden.*
- 37) *We need three ropes in order to keep the camel from dancing.*
- 38) *We're trying another trick now to make the elephant eat his soup.*
- 39) *It's nice for the elephant to play trumpet, but we strive for a whole orchestra.*
- 40) *Thing is, I promised that I would go to the doctor with our giraffe.*
- 41) *Bad things will happen if you don't make it to the tiger's cage before him.*
- 42) *I love backgammon, but it's no fun to play it with the camel.*
- 43) *We are here to see the tiger dance, so cease the fighting, please.*
- 44) *What brought you to volunteer as percussionist in the penguins' blues band?*
- 45) *My pregnant giraffe craved mangoes, so I went to the store.*
- 46) *You see I vowed that I would come to the penguins' blues concert.*
- 47) *When the tiger plays the harmonica, that is something to fear.*
- 48) *Remember how we went to Antarctica with the penguins?*

[numbers 9 and 19 are missing because they were assigned to items that were not included in the end.]

### **Distractor items (contain no *to*)**

- d2) *In fact, canoeing is the crocodiles' favorite sport.*
- d3) *On Wednesday the monkeys formed a jazz combo.*
- d4) *There is just no point in teaching the crocodiles manners.*
- d5) *Now the harmonica is broken, the tiger sings a-cappella.*
- d6) *The crocodiles can stay, as long as the don't make any trouble.*
- d7) *Perhaps the penguins should let the tiger join their blues band.*
- d8) *You see, the penguins never felt quite at home in the jungle.*
- d10) *There are a lot of coconuts left over from the monkeys' party.*
- d11) *The crocodiles are not invited when we play backgammon.*
- d12) *Yesterday I was told that the camel was getting better.*
- d13) *This morning I gave the camel the wrong medicine.*
- d14) *Next week we will send our camel on a vacation.*
- d15) *Whoever has taken the elephant's trumpet should bring it back.*

- d16) The penguins say that chocolate is not part of their usual diet.*
- d17) When the elephant comes home he takes a dip in the pond.*
- d18) Our African giraffe is now taking a yoga course.*
- d19) I'm afraid the elephant is a little big for this rocking chair.*
- d20) Are there any games other than backgammon that we can play?*
- d21) Our giraffe can reach the cookie box on top of the cupboard.*
- d22) Someone should help the monkeys with their math homework.*
- d23) That old rocking chair can keep the monkeys occupied for hours.*
- d24) There is no reason for being afraid of the crocodiles.*
- d25) What makes you think the crocodiles are not interested in dancing?*
- d26) For weeks now we haven't come across a human being.*
- d27) It's been three hours since the crocodiles had their dinner.*
- d28) Finally the penguins convinced me that they should get music lessons.*
- d29) The camel and the penguins are having an argument about shoes.*
- d30) The problem with the crocodiles is that they never share their food.*
- d31) Unfortunately the tiger is not a very talented dancer.*
- d32) There are many things that you can eat in the jungle.*
- d33) When canoeing in the jungle you should always wear a hat.*
- d34) But you must be really careful with the tiger's harmonica.*
- d35) That backgammon competition last night got out of hand.*
- d36) When we played chess the giraffe picked up the rules very quickly.*
- d37) The elephant is hiding chocolate all over the house.*
- d38) I think our elephant is making friends with those crocodiles.*
- d39) You see, chess is simply not a game for three players.*
- d40) I never understood why the trees in the jungle are so tall.*
- d41) The elephant placed a bowl of soup on the table in front of him and rubbed his hands.*
- d42) I can't believe the crocodiles are selling leather handbags.*
- d43) Yesterday the monkey climbed higher up than ever before.*
- d45) During the night the jungle is full of eerie noises.*

[numbers 1, 9 and 44 are missing because they were assigned to items that were not included in the end.]
